# Supplementary material for: The Anti-Tubercular Aminolipopeptide Trichoderin A Displays Selective Toxicity against Human Pancreatic Ductal Adenocarcinoma Cells Cultured under Glucose Starvation
Source: MDPI journal article supplement (doi:10.3390/pharmaceutics15010287), 2023-01-14
Supplement: s1 [file s1]

Supporting information for:

# The Anti-Tubercular Aminolipopeptide Trichoderin A Displays Selective Toxicity against Human Pancreatic Ductal Adenocarcinoma Cells Cultured under Glucose Starvation

Johanes K. Kasim <sup>1,2</sup>, Jiwon Hong <sup>1,2,3,4</sup>, Anthony J. R. Hickey <sup>1,2</sup>, Anthony R. J. Phillips <sup>1,2,3,4</sup>, John A. Windsor <sup>2,3,4</sup>,

Paul W. R. Harris <sup>1,2,5</sup>, Margaret A. Brimble <sup>1,2,5</sup> and Iman Kavianinia <sup>1,2,5,\*</sup>

<sup>1</sup> School of Biological Sciences, The University of Auckland, 3A Symonds Street, Auckland 1010, New Zealand

<sup>2</sup> Maurice Wilkins Centre for Molecular Biodiscovery, The University of Auckland, 3A Symonds Street, Auckland 1010, New Zealand

<sup>3</sup> Surgical and Translational Research Centre, The University of Auckland, 22-30 Park Avenue, Auckland 1023, New Zealand

<sup>4</sup> Department of Surgery, The University of Auckland, 22-30 Park Avenue, Auckland 1023, New Zealand

<sup>5</sup> School of Chemical Sciences, The University of Auckland, 23 Symonds Street, Auckland 1010, New Zealand

\* Correspondence: i.kavianinia@auckland.ac.nz

## Materials and Methods

### Materials

All reagents purchased from commercial vendors were used without additional purification. *N,N*-diisopropylethylamine (DIPEA; ReagentPlus grade), piperidine, propionic acid, butanoic acid, hexanoic acid, octanoic acid, decanoic acid, dodecanoic acid, formic acid (LC-MS grade), acetic anhydride, *N,N'*-diisopropylcarbodiimide (DIC), and dimethyl sulfoxide (DMSO, cell culture grade) were supplied by Sigma-Aldrich (St Louis, MO). *N,N*-dimethylformamide (DMF), dichloromethane (CH<sub>2</sub>Cl<sub>2</sub>), and methanol (MeOH) were purchased from ECP Ltd. (Auckland, NZ). Milli-Q water (H<sub>2</sub>O) for RP-HPLC and LC-MS was obtained from the Sartorius arium pro ultrapure water production system (Gottingen, Germany). *O*-(7-azabenzotriazol-1-yl)-*N,N,N',N'*-tetramethyluronium hexafluorophosphate (HATU) and ethyl-2-cyano-2-(hydroxyamino)acetate (Oxyma Pure) were purchased from Novabiochem (Darmstadt, Germany). 1-[(1-(Cyano-2-ethoxy-2-oxoethylideneaminoxy)-dimethylaminomorpholinomethylene)] methanaminium hexafluorophosphate (COMU) and 6-chloro-1-hydroxybenzotriazole (6-Cl-HOBt) were sourced from Aapptec (Louisville, KY). HPLC and LC-MS grade acetonitrile (CH<sub>3</sub>CN) were purchased from Merck (Darmstadt, Germany). Trifluoroacetic acid (TFA) was purchased from Oakwood Chemicals (Estill, SC). 2-Chlorotriyl chloride (2-CTC)

polystyrene resin, Fmoc- $\alpha$ -aminoisobutyric acid (Aib), Fmoc-Ile-OH, Fmoc-Val-OH, and Fmoc-Pro-OH were purchased from CS Bio (Shanghai, China). Boc-Pro-OH was purchased from PolyPeptide Group (Zug, Switzerland). Fmoc-Cha-OH, and 1,1,1,3,3,3-hexafluoro-2-propanol (HFIP) were purchased from AK Scientific (Union City, CA). Leucinostatin A was purchased from Santa Cruz Biotechnology, Inc. (Dallas, TX). Trichoderin A, (2*R*)-methyldecanoic acid (MDA), (2*S*,4*S*,6*R*)-2-amino-6-hydroxy-4-methyl-8-oxodecanoic acid (AHMOD) and (S)-2-(2-aminopropyl(methyl)amino)ethanol (AMAE) were synthesised in house as previously reported [1]. Nunc MicroWell 96-Well Black Optical-Bottom Plates with Polymer Base, PrestoBlue™ Cell Viability Reagent, CyQUANT™ Direct Cell Proliferation Assay, Roswell Park Memorial Institute (RPMI) 1640 medium (ATCC Modification, #A1049101; 25 mM glucose), RPMI 1640 medium (no glucose, #11879020), Dulbecco's Eagle Modified Medium (DMEM; high glucose, pyruvate, #11995040; 25 mM glucose), DMEM (no glucose, #11966025), sodium pyruvate (100 mM), d-glucose solution (200 g/L), antibiotic-antimycotic (A/A), TrypLE™ Express Enzyme (1×) (phenol red, #12605010), and phosphate-buffered saline (PBS, pH 7.4) were purchased from Thermo Fisher Scientific (Waltham, MA). Foetal bovine serum (FBS, heat-inactivated) was purchased from Moredgate Biotech (Hamilton, NZ).

### **General Procedure for Peptide Synthesis**

The peptides were assembled manually by 9-fluorenylmethoxycarbonyl/*tert*-butyl solid phase peptide synthesis (Fmoc/*t*Bu SPPS) in a fritted glass reaction vessel.

#### Method 1) Attachment of Fmoc-Aib-OH on resin

A solution of Fmoc-Aib-OH (5 eq., 162.7 mg, 0.5 mmol) and DIPEA (10 eq., 172  $\mu$ L, 1 mmol) in CH<sub>2</sub>Cl<sub>2</sub> (3 mL) was added to 2-CTC resin (112.4 mg, 0.1 mmol; loading: 0.89 mmol/g) that has been pre-swollen in CH<sub>2</sub>Cl<sub>2</sub> (3 mL) for 15 min. The reaction mixture was agitated for 6 h at room temperature, filtered, and repeated with fresh reagents for a further 6 h. Excess solvent was then filtered, and the resin bed treated with a mixture of CH<sub>2</sub>Cl<sub>2</sub>/MeOH/DIPEA (8:1.5:0.5, *v/v/v*, 3 mL) for 15 min at room temperature to cap unreacted chlorides on the resin.

#### Method 2) Spectrophotometric quantitation of first residue loading on resin

Loading of the first residue on resin was quantified on the Shimadzu UV-1280 UV-VIS spectrophotometer (Kyoto, Japan). Resin that has been dried under vacuum was weighed into a Starna Scientific 10-mm matched silica UV spectrophotometric cuvette (Ilford, UK). 20% piperidine/DMF (*v/v*, 3 mL) was dispensed into the cuvette, briefly agitated with a pipettor to achieve a uniform suspension, then left for 5 min at room temperature. A reference cuvette, containing only 20% piperidine/DMF (*v/v*, 3 mL), was used to zero the spectrophotometer at the wavelength of 290 nm. The absorbance

of the resin-containing cuvette was recorded as an average of three independent measurements, and the loading of the first residue calculated by the following **Equation (1)**:

$$\text{Loading} = \frac{\text{Absorbance}}{(\text{Resin mass} \times 1.75)}$$

**Equation (1).** Estimation of first residue attachment on resin. Loading is measured in mmol/g.

#### Method 3) Removal of Fmoc protecting group

A solution of 20% piperidine/DMF (*v/v*, 3 mL) was added to the peptidyl resin to remove the Fmoc protecting group. The reaction mixture was agitated for 5 min at room temperature, filtered, and the reaction repeated with fresh reagents for a further 10 min. Excess solvent was then filtered and the resin bed washed with DMF (3 × 3 mL).

#### Method 4) Procedure for the difficult sequential Aib-Aib coupling on resin

A solution of Fmoc-Aib-OH (5 eq., 162.7 mg, 0.5 mmol), COMU (5 eq., 214 mg, 0.5 mmol), Oxyma (5 eq., 71 mg, 0.5 mmol) and DIPEA (10 eq., 172 µL, 1 mmol) in DMF (3 mL) was added to the peptidyl resin (0.1 mmol). The reaction mixture was agitated for 2 h at room temperature, filtered, and the reaction repeated with fresh reagents for a further 2 h. Excess solvent was then filtered and the resin bed washed with DMF (3 × 3 mL).

#### Method 5) Coupling of Fmoc-protected amino acid

A solution of the appropriate Fmoc-Aa-OH (5 eq., 0.5 mmol), HATU (4.9 eq., 186 mg, 0.49 mmol) and DIPEA (10 eq., 172 µL, 1 mmol) in DMF (3 mL) was added to the peptidyl resin (0.1 mmol). The reaction mixture was agitated for 1 h at room temperature, filtered, and the reaction repeated with fresh reagents for a further 1 h. Excess solvent was then filtered and the resin bed washed with DMF (3 × 3 mL).

#### Method 6) Attachment of N-terminal fatty acid

A solution of the appropriate fatty acid (5 eq., 0.5 mmol), COMU (5 eq., 214 mg, 0.5 mmol), Oxyma (5 eq., 71 mg, 0.5 mmol) and DIPEA (10 eq., 172 µL, 1 mmol) in DMF (3 mL) was added to the peptidyl resin (0.1 mmol). The reaction mixture was agitated for 3 h at room temperature. Excess solvent was then filtered, the resin bed washed with DMF (3 × 3 mL) and CH<sub>2</sub>Cl<sub>2</sub> (3 × 3 mL), then dried under vacuum.

#### Method 7) HFIP-mediated resin cleavage

The resin bed was treated with 20% HFIP/CH<sub>2</sub>Cl<sub>2</sub> (*v/v*, 5 mL) to release the completed peptide chain. The reaction mixture was agitated for 30 min at room temperature, filtered, and the reaction repeated with fresh reagents for a further 30 min. The collected filtrate was partially concentrated under a gentle stream of nitrogen, reconstituted in CH<sub>3</sub>CN/H<sub>2</sub>O (*v/v*, 10 mL) and lyophilised.

#### Method 8) Late-stage solution phase C-terminal coupling of AMAE

The C-terminal AMAE residue was conjugated to the peptide as a TFA salt. A solution of AMAE.2TFA (3 eq.), DIC (6 eq.), 6-Cl-HOBt (6 eq.), and DIPEA (6 eq.) in DMF was added to the purified peptide from **Method 7**. The reaction mixture was agitated for 12 h at room temperature and completion of the reaction was monitored by analytical RP-HPLC and ESI-MS. The peptide mixture was then purified batch-wise by semi-preparative RP-HPLC.

## Synthesis of trichoderin A analogue (12)

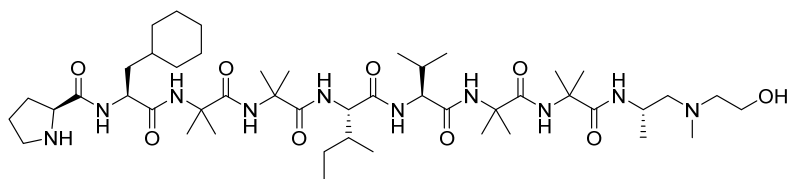

**Figure S1.** Chemical structure of trichoderin A analogue (12).

The C-terminal residue Fmoc-Aib-OH was attached to 2-chlorotrityl chloride resin **S1** according to **Method 1** to form peptidyl resin **S2** (**Scheme S1**). Loading was determined to be 0.43 mmol/g by **Method 2**. The N $^{\alpha}$ -Fmoc-protecting group was removed using **Method 3** followed by coupling of Fmoc-Aib-OH via **Method 4** to give **S3**. The N $^{\alpha}$ -Fmoc-protecting group was then removed using **Method 3** followed by coupling of Fmoc-Val-OH, Fmoc-Ile-OH, and Fmoc-Aib-OH via **Method 5** to afford peptidyl resin **S4**. After removal of N $^{\alpha}$ -Fmoc-protecting group using **Method 3**, Fmoc-Aib-OH was coupled via **Method 4** to yield **S5**, followed by coupling of Fmoc-Cha-OH and Boc-Pro-OH by **Method 5** to complete the linear peptide sequence of **S6**. Resin-bound peptide was cleaved using **Method 7**, and the crude residue was purified by semi-preparative RP-HPLC using conditions outlined in the general method. Fractions were collected at 1 min intervals and analysed by ESI-MS and RP-HPLC. Fractions identified with the correct  $m/z$  were combined and lyophilised to afford peptide **S7** as white fluffy flakes (27.9 mg, 30.3% yield). Late-stage solution phase C-terminal coupling was employed to introduce the C-terminal aminoalcohol moiety on the peptide (27.9 mg, 0.03 mmol) dissolved in 0.5 mL DMF using **Method 8**. The crude peptide solution was purified by semi-preparative RP-HPLC in 5  $\times$  100  $\mu$ L batches using conditions outlined in the general method. Fractions were collected at 1 min intervals and analysed by ESI-MS and RP-HPLC. Fractions identified with the correct  $m/z$  were combined, lyophilised, and subjected to N $^{\alpha}$ -Boc deprotection using TFA/CH<sub>2</sub>Cl<sub>2</sub> (1:1,  $v/v$ ) at room temperature for 1 h to afford trichoderin A analogue (**12**) as a white amorphous solid (7.6 mg, 8.1% overall yield based on 0.1 mmol resin loading, 98.0% purity);  $t_R$  16.0 min; LRMS:  $m/z$  (ESI-MS) 935.2 ([M+H]<sup>+</sup> requires 935.3), **Figures S1-S2**. The peptide was subsequently evaluated for its *in vitro* cytotoxicity against BxPC-3 and PANC-1 human PDAC cells under both glucose-replete and glucose-deprived conditions on the same plate (**Figure S3**).

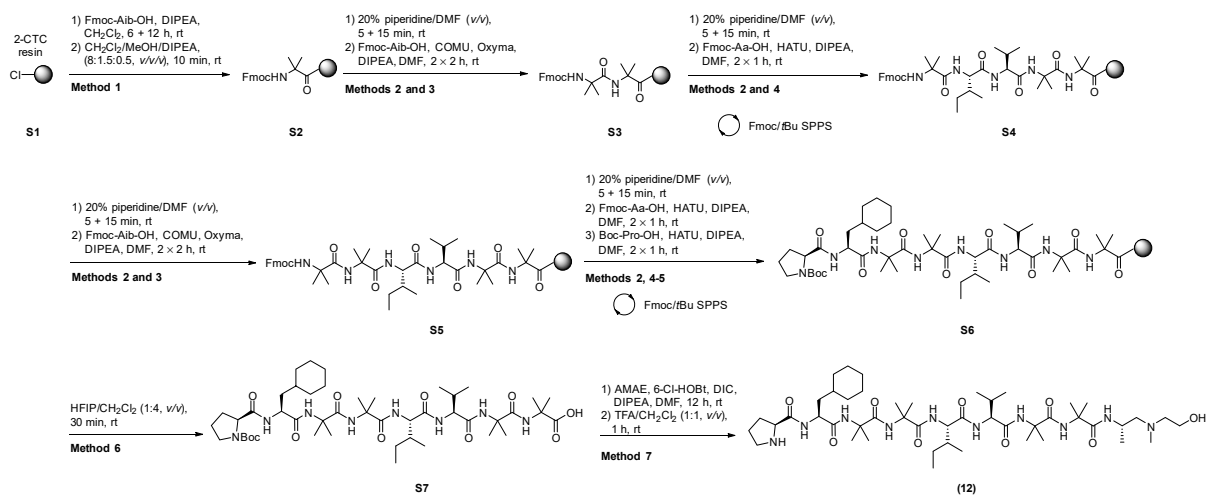

**Scheme S1. Fmoc/*t*Bu SPPS of trichodermin A analogue (12).**

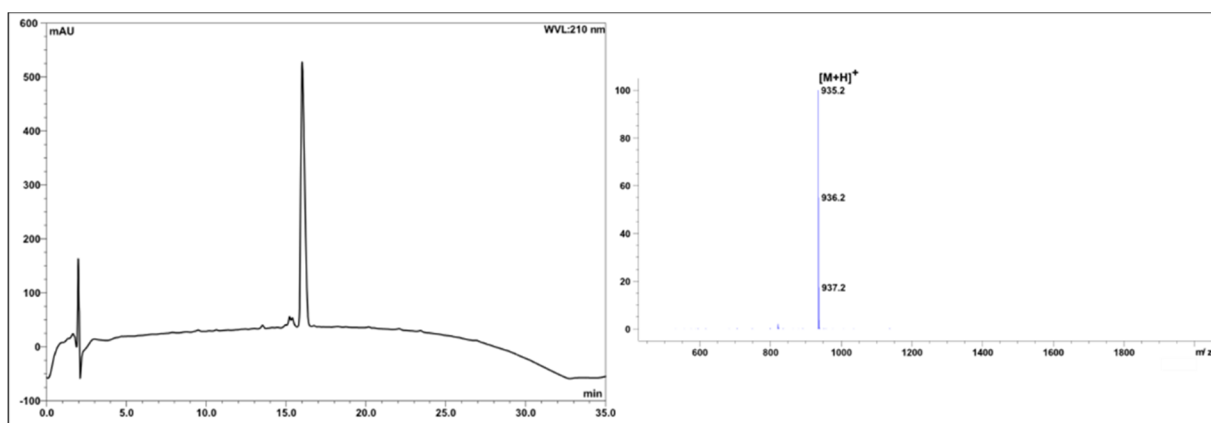

**Figure S2. Analytical RP-HPLC profile of pure peptide (12) (ca. 98% as judged by peak area at 210 nm); xTerra® MS C18, 4.6 × 150 mm, 5 μm, linear gradient of 5% B to 95% B (ca. 3% B/min), 1 mL/min. *m/z* [M+H]<sup>+</sup> calculated: 935.3; found: 935.2.**

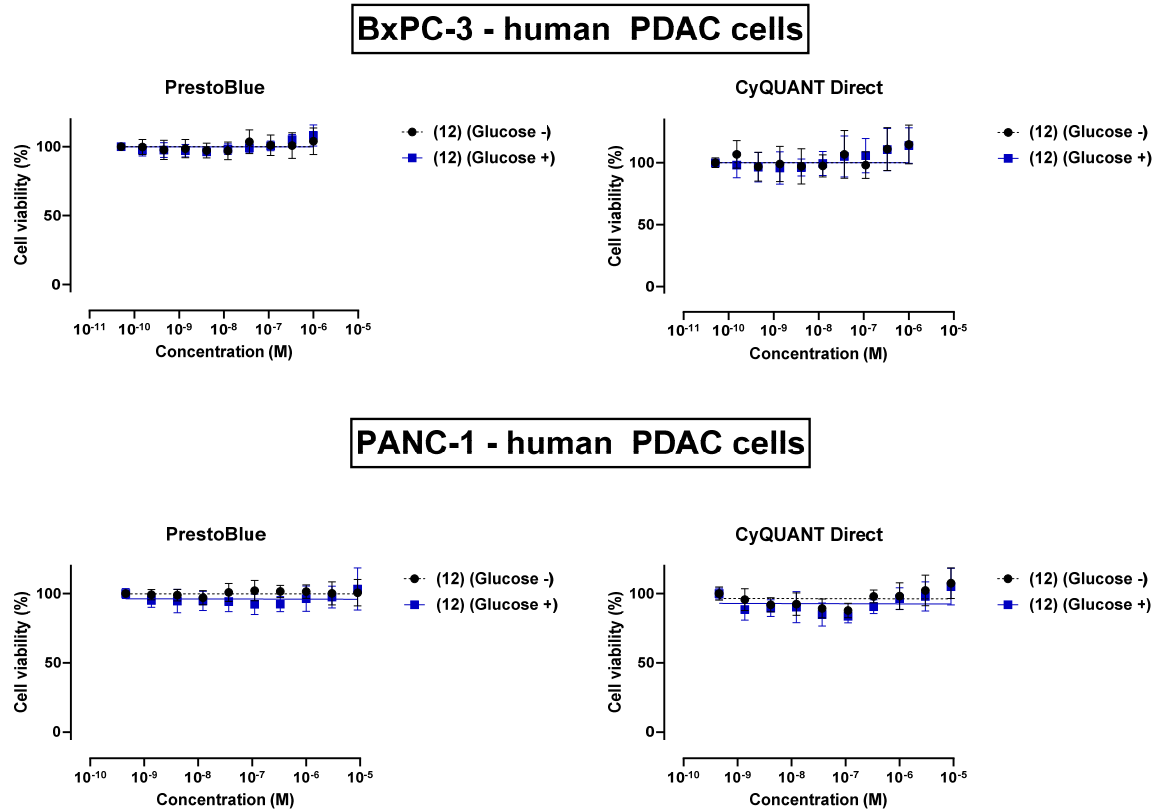

**Figure S3.** Comparative percent viability of BxPC-3 and PANC-1 human PDAC cells cultured under 'low glucose' (Glucose -) and 'normal glucose' (Glucose +) conditions following a 1-day exposure to trichoderin A analogue (12), as judged by the PrestoBlue™ and CyQUANT™ Direct assays.

### Synthesis of trichoderin A analogue (13)

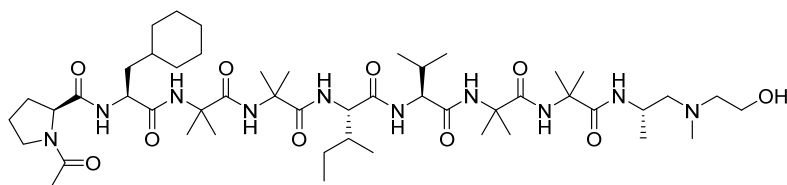

**Figure S4.** Chemical structure of trichoderin A analogue (13).

The C-terminal residue Fmoc-Aib-OH was attached to 2-chlorotrityl chloride resin **S1** according to **Method 1** to form peptidyl resin **S2** (**Scheme S2**). Loading was determined to be 0.43 mmol/g by **Method 2**. The N<sup>α</sup>-Fmoc-protecting group was removed using **Method 3** followed by coupling of Fmoc-Aib-OH via **Method 4** to give **S3**. The N<sup>α</sup>-Fmoc-protecting group was then removed using **Method 3** followed by coupling of Fmoc-Val-OH, Fmoc-Ile-OH, and Fmoc-Aib-OH via **Method 5** to afford peptidyl resin **S4**. After removal of N<sup>α</sup>-Fmoc-protecting group using **Method 3**, Fmoc-Aib-OH was coupled via **Method 4** to yield **S5**, followed by coupling of Fmoc-Cha-OH and Fmoc-Pro-OH by **Method 5**. The N<sup>α</sup>-Fmoc protecting group was then removed via **Method 3** and the N-terminus capped with 20% acetic anhydride/DMF (*v/v*) at room temperature for 2 × 5 min to complete the linear peptide sequence of **S8**. Resin-bound peptide was cleaved using **Method 7**, and the crude residue was purified by semi-preparative RP-HPLC using conditions outlined in the general method. Fractions were collected at 1 min intervals and analysed by ESI-MS and RP-HPLC. Fractions identified with the correct *m/z* were combined and lyophilised to afford peptide **S9** as white fluffy flakes (7.2 mg, 8.3% yield). Late-stage solution phase C-terminal coupling was employed to introduce the C-terminal aminoalcohol moiety on the peptide (7.6 mg, 0.009 mmol) dissolved in 0.5 mL DMF using **Method 8**. The crude peptide solution was purified by semi-preparative RP-HPLC in 5 × 100 μL batches using conditions outlined in the general method. Fractions were collected at 1 min intervals and analysed by ESI-MS and RP-HPLC. Fractions identified with the correct *m/z* were combined and lyophilised to afford trichoderin A analogue (**13**) as a white amorphous solid (4.0 mg, 4.1% overall yield based on 0.1 mmol resin loading, >99% purity); *t<sub>R</sub>* 20.7 min; LRMS: *m/z* (ESI-MS) 977.2 ([M+H]<sup>+</sup> requires 977.3), **Figures S4-S5**. The peptide was subsequently evaluated for its *in vitro* cytotoxicity against BxPC-3 and PANC-1 human PDAC cells under both glucose-replete and glucose-deprived conditions on the same plate (**Figure S6**).



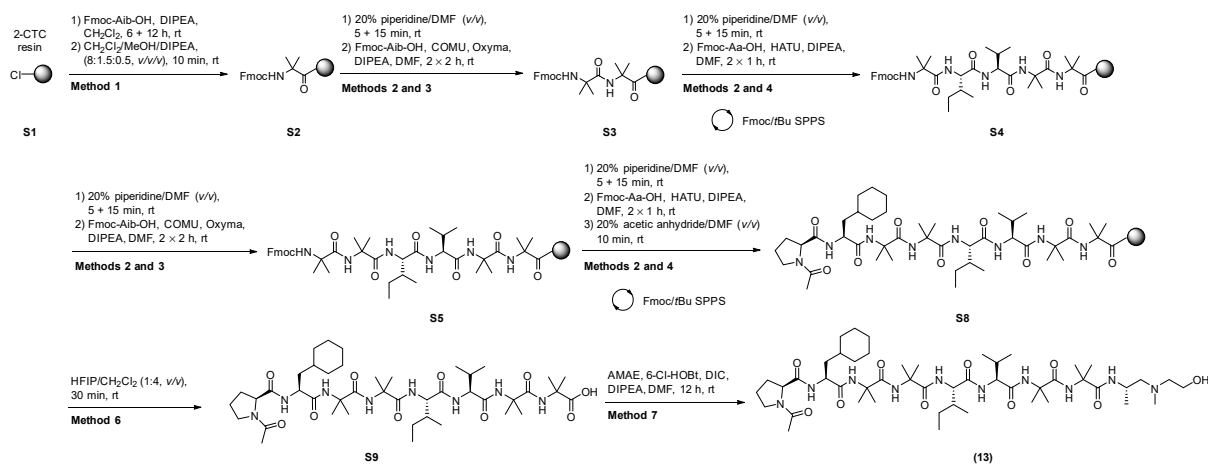

**Scheme S2.** Fmoc/tBu SPPS of trichodermin A analogue (13).

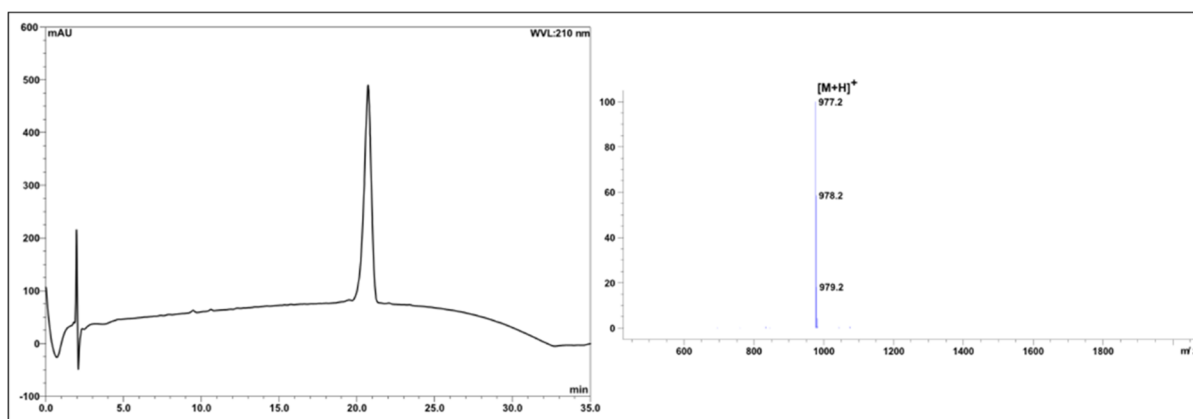

**Figure S5.** Analytical RP-HPLC profile of pure peptide (13) (*ca.* 99% as judged by peak area at 210 nm); xTerra® MS C18, 4.6 × 150 mm, 5 μm, linear gradient of 5% B to 95% B (*ca.* 3% B/min), 1 mL/min. *m/z* [M+H]<sup>+</sup> calculated: 977.3; found: 977.2.

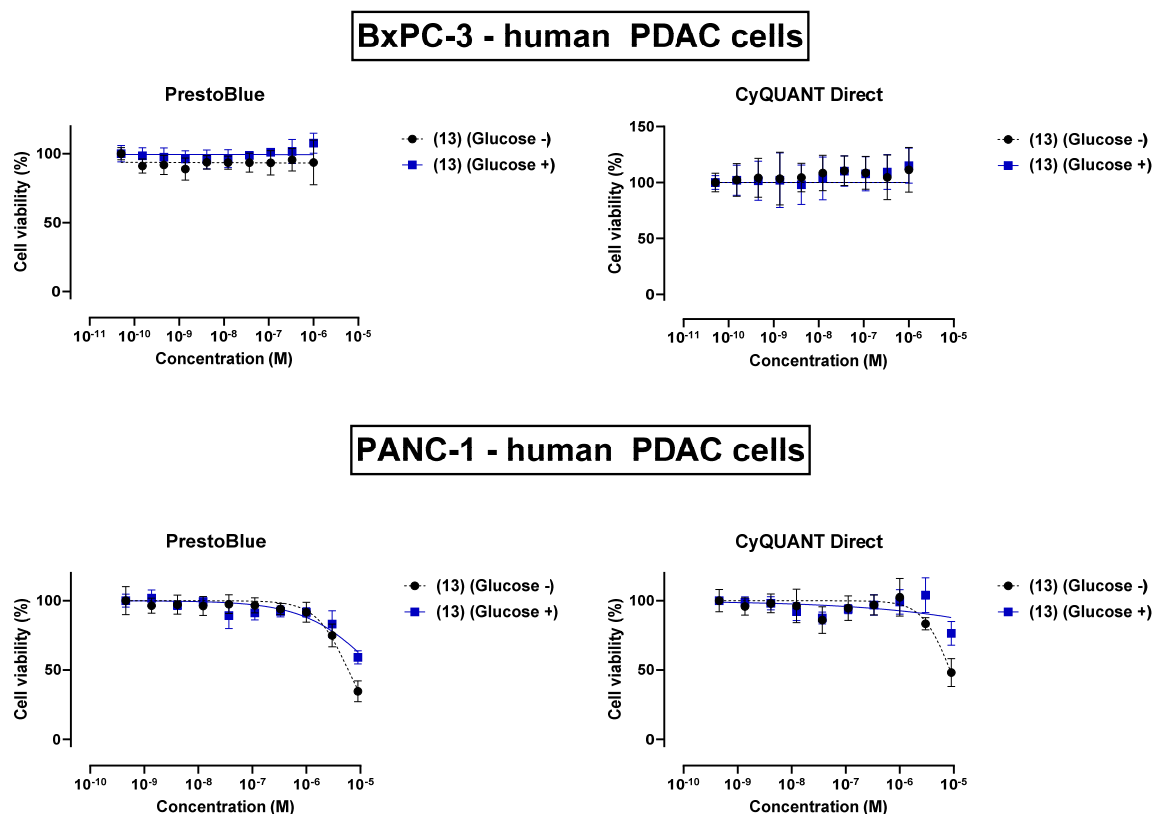

**Figure S6.** Comparative percent viability of BxPC-3 and PANC-1 human PDAC cells cultured under 'low glucose' (Glucose -) and 'normal glucose' (Glucose +) conditions following a 1-day exposure to trichoderin A analogue (**13**), as judged by the PrestoBlue™ and CyQUANT™ Direct assays.

## Synthesis of trichoderin A analogue (14)

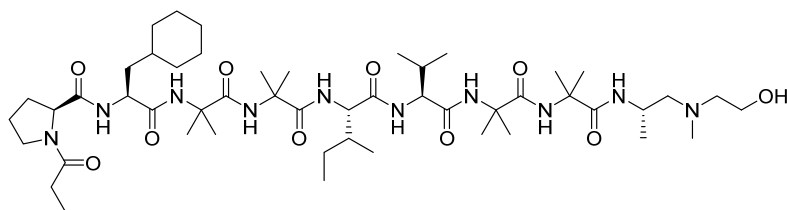

**Figure S7.** Chemical structure of trichoderin A analogue (**14**).

The C-terminal residue Fmoc-Aib-OH was attached to 2-chlorotrityl chloride resin **S1** according to **Method 1** to form peptidyl resin **S2** (**Scheme S3**). Loading was determined to be 0.43 mmol/g by **Method 2**. The N $^{\alpha}$ -Fmoc-protecting group was removed using **Method 3** followed by coupling of Fmoc-Aib-OH via **Method 4** to give **S3**. The N $^{\alpha}$ -Fmoc-protecting group was then removed using **Method 3** followed by coupling of Fmoc-Val-OH, Fmoc-Ile-OH, and Fmoc-Aib-OH via **Method 5** to afford peptidyl resin **S4**. After removal of N $^{\alpha}$ -Fmoc-protecting group using **Method 3**, Fmoc-Aib-OH was coupled via **Method 4** to yield **S5**, followed by coupling of Fmoc-Cha-OH and Fmoc-Pro-OH by **Method 5**, and propionic acid via **Method 6** to complete the linear peptide sequence of **S10**. Resin-bound peptide was cleaved using **Method 7**, and the crude residue was purified by semi-preparative RP-HPLC using conditions outlined in the general method. Fractions were collected at 1 min intervals and analysed by ESI-MS and RP-HPLC. Fractions identified with the correct  $m/z$  were combined and lyophilised to afford peptide **S11** as white fluffy flakes (27.2 mg, 31.0% yield). Late-stage solution phase C-terminal coupling was employed to introduce the C-terminal aminoalcohol moiety on the peptide (27.2 mg, 0.03 mmol) dissolved in 0.5 mL DMF using **Method 8**. The crude peptide solution was purified by semi-preparative RP-HPLC in 5  $\times$  100  $\mu$ L batches using conditions outlined in the general method. Fractions were collected at 1 min intervals and analysed by ESI-MS and RP-HPLC. Fractions identified with the correct  $m/z$  were combined and lyophilised to afford trichoderin A analogue (**14**) as a white amorphous solid (10.2 mg, 10.3% overall yield based on 0.1 mmol resin loading, 98.9% purity);  $t_R$  21.5 min; LRMS:  $m/z$  (ESI-MS) 991.2 ([M+H] $^+$  requires 991.3), **Figures S7-S8**. The peptide was subsequently evaluated for its *in vitro* cytotoxicity against BxPC-3 and PANC-1 human PDAC cells under both glucose-replete and glucose-deprived conditions on the same plate (**Figure S9**).

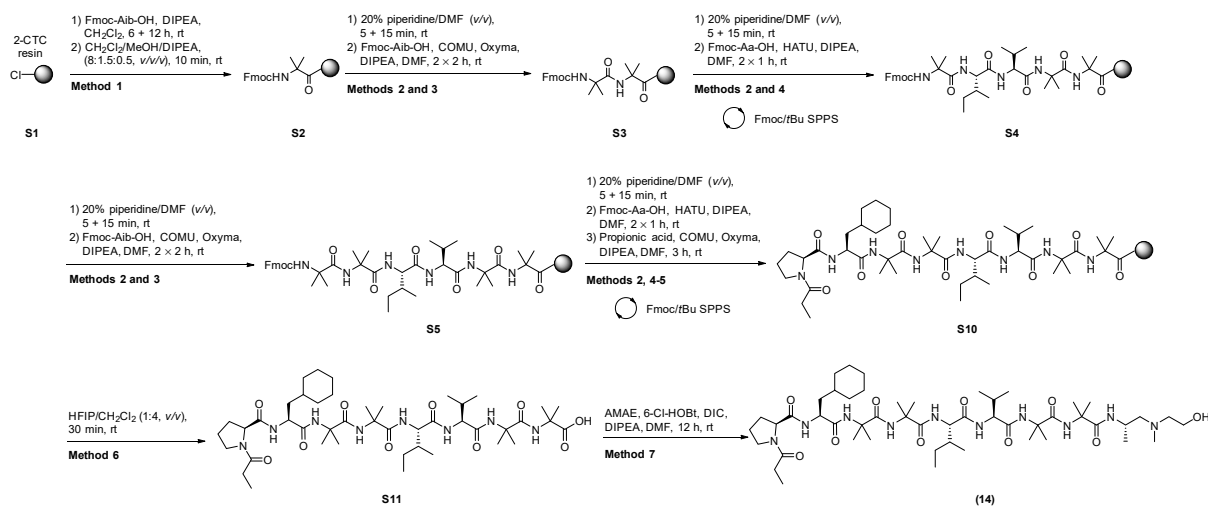

**Scheme S3. Fmoc/*t*Bu SPPS of trichodermin A analogue (14).**

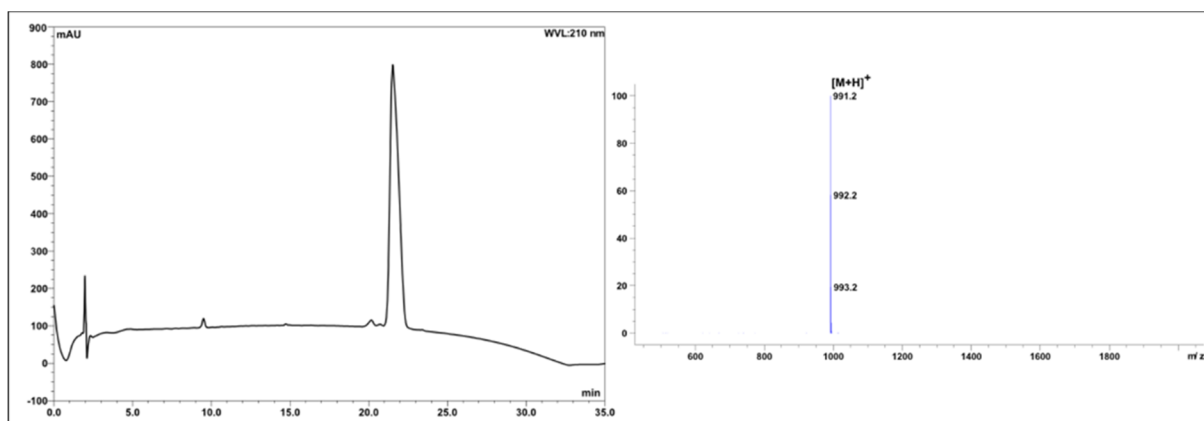

**Figure S8. Analytical RP-HPLC profile of pure peptide (14) (ca. 99% as judged by peak area at 210 nm); xTerra® MS C18, 4.6 × 150 mm, 5 μm, linear gradient of 5% B to 95% B (ca. 3% B/min), 1 mL/min. *m/z* [M+H]<sup>+</sup> calculated: 991.3; found: 991.2.**

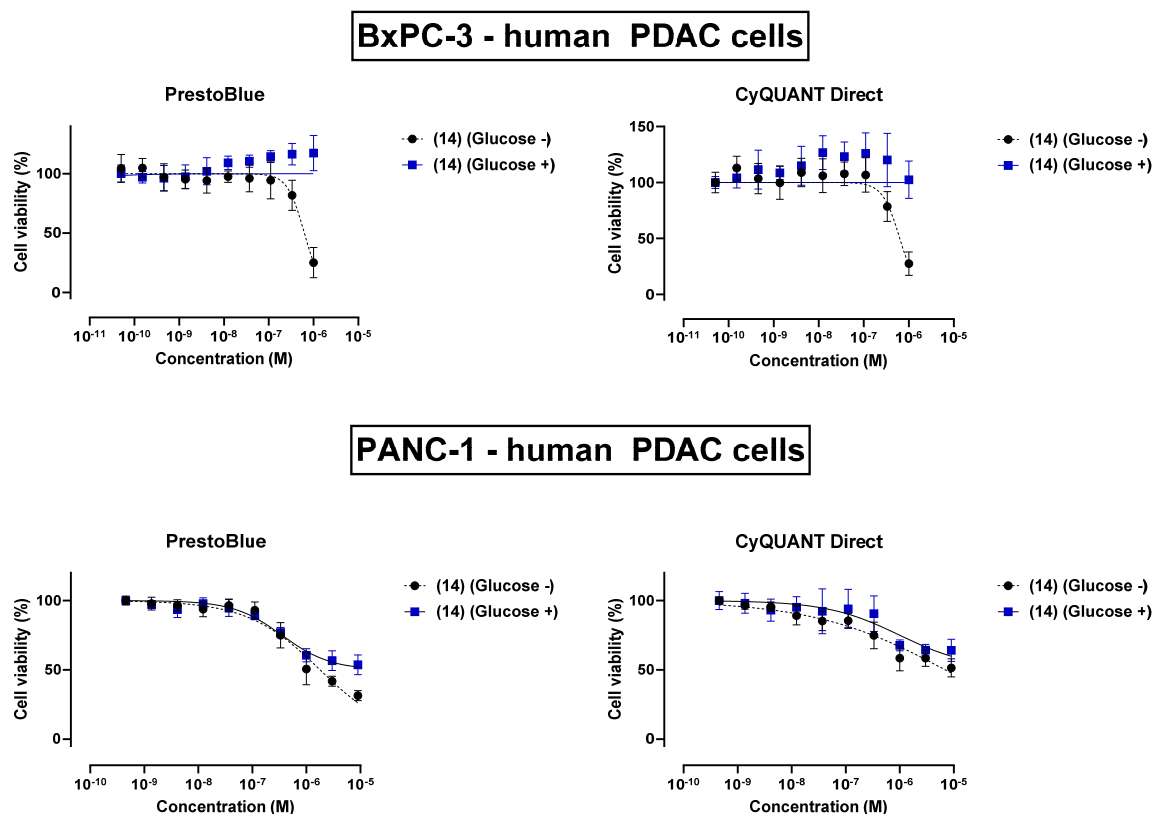

**Figure S9.** Comparative percent viability of BxPC-3 and PANC-1 human PDAC cells cultured under 'low glucose' (Glucose -) and 'normal glucose' (Glucose +) conditions following a 1-day exposure to trichoderin A analogue (14), as judged by the PrestoBlue™ and CyQUANT™ Direct assays.

### Synthesis of trichoderin A analogue (15)

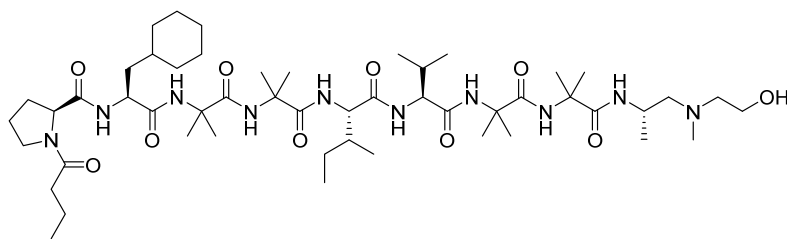

**Figure S10.** Chemical structure of trichoderin A analogue (15).

The C-terminal residue Fmoc-Aib-OH was attached to 2-chlorotrityl chloride resin **S1** according to **Method 1** to form peptidyl resin **S2** (**Scheme S4**). Loading was determined to be 0.43 mmol/g by **Method 2**. The N $^{\alpha}$ -Fmoc-protecting group was removed using **Method 3** followed by coupling of Fmoc-Aib-OH via **Method 4** to give **S3**. The N $^{\alpha}$ -Fmoc-protecting group was then removed using **Method 3** followed by coupling of Fmoc-Val-OH, Fmoc-Ile-OH, and Fmoc-Aib-OH via **Method 5** to afford peptidyl resin **S4**. After removal of N $^{\alpha}$ -Fmoc-protecting group using **Method 3**, Fmoc-Aib-OH was coupled via **Method 4** to yield **S5**, followed by coupling of Fmoc-Cha-OH and Fmoc-Pro-OH by **Method 5**, and butyric acid via **Method 6** to complete the linear peptide sequence of **S12**. Resin-bound peptide was cleaved using **Method 7**, and the crude residue was purified by semi-preparative RP-HPLC using conditions outlined in the general method. Fractions were collected at 1 min intervals and analysed by ESI-MS and RP-HPLC. Fractions identified with the correct  $m/z$  were combined and lyophilised to afford peptide **S13** as white fluffy flakes (16.6 mg, 18.6% yield). Late-stage solution phase C-terminal coupling was employed to introduce the C-terminal aminoalcohol moiety on the peptide (16.6 mg, 0.02 mmol) dissolved in 0.5 mL DMF using **Method 8**. The crude peptide solution was purified by semi-preparative RP-HPLC in 5  $\times$  100  $\mu$ L batches using conditions outlined in the general method. Fractions were collected at 1 min intervals and analysed by ESI-MS and RP-HPLC. Fractions identified with the correct  $m/z$  were combined and lyophilised to afford trichoderin A analogue (**15**) as a white amorphous solid (3.6 mg, 3.6% overall yield based on 0.1 mmol resin loading, 98.9% purity);  $t_R$  22.7 min; LRMS:  $m/z$  (ESI-MS) 1005.2 ( $[M+H]^+$  requires 1005.4), **Figures S10-S11**. The peptide was subsequently evaluated for its *in vitro* cytotoxicity against BxPC-3 and PANC-1 human PDAC cells under both glucose-replete and glucose-deprived conditions on the same plate (**Figure S12**).

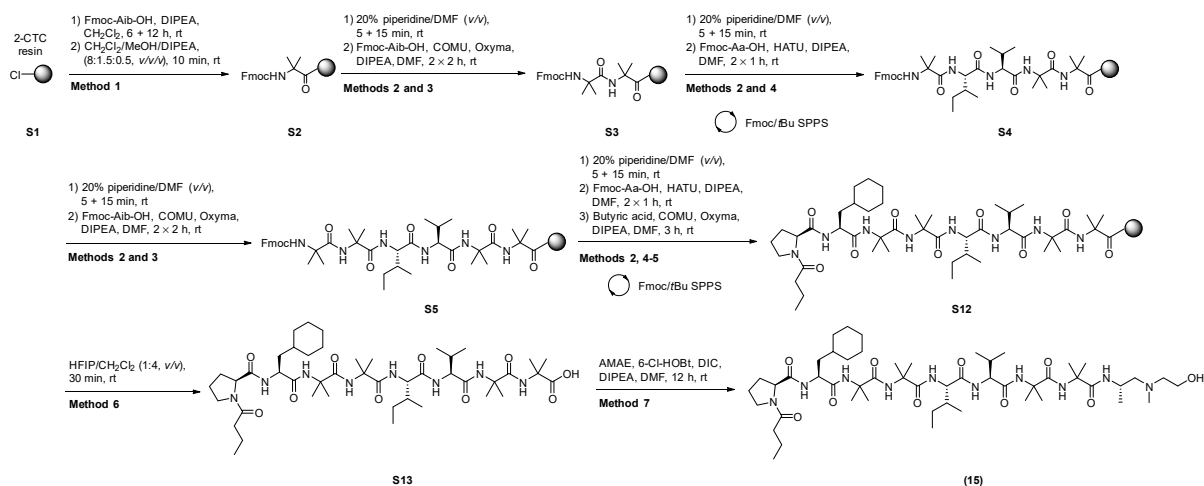

**Scheme S4.** Fmoc/*t*Bu SPPS of trichodermin A analogue (**15**).

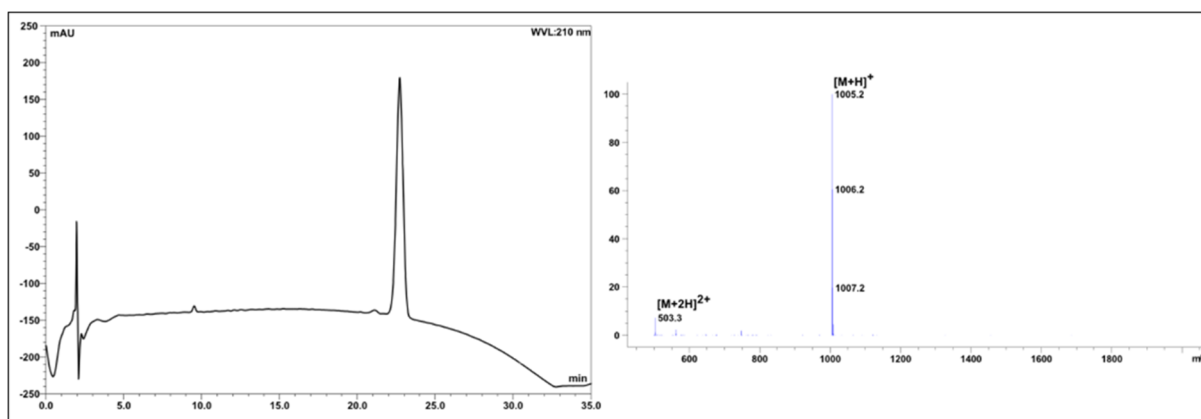

**Figure S11.** Analytical RP-HPLC profile of pure peptide (**15**) (*ca.* 99% as judged by peak area at 210 nm); xTerra® MS C18, 4.6 × 150 mm, 5 μm, linear gradient of 5% B to 95% B (*ca.* 3% B/min), 1 mL/min.  $m/z$   $[M+H]^+$  calculated: 1005.4; found: 1005.2.

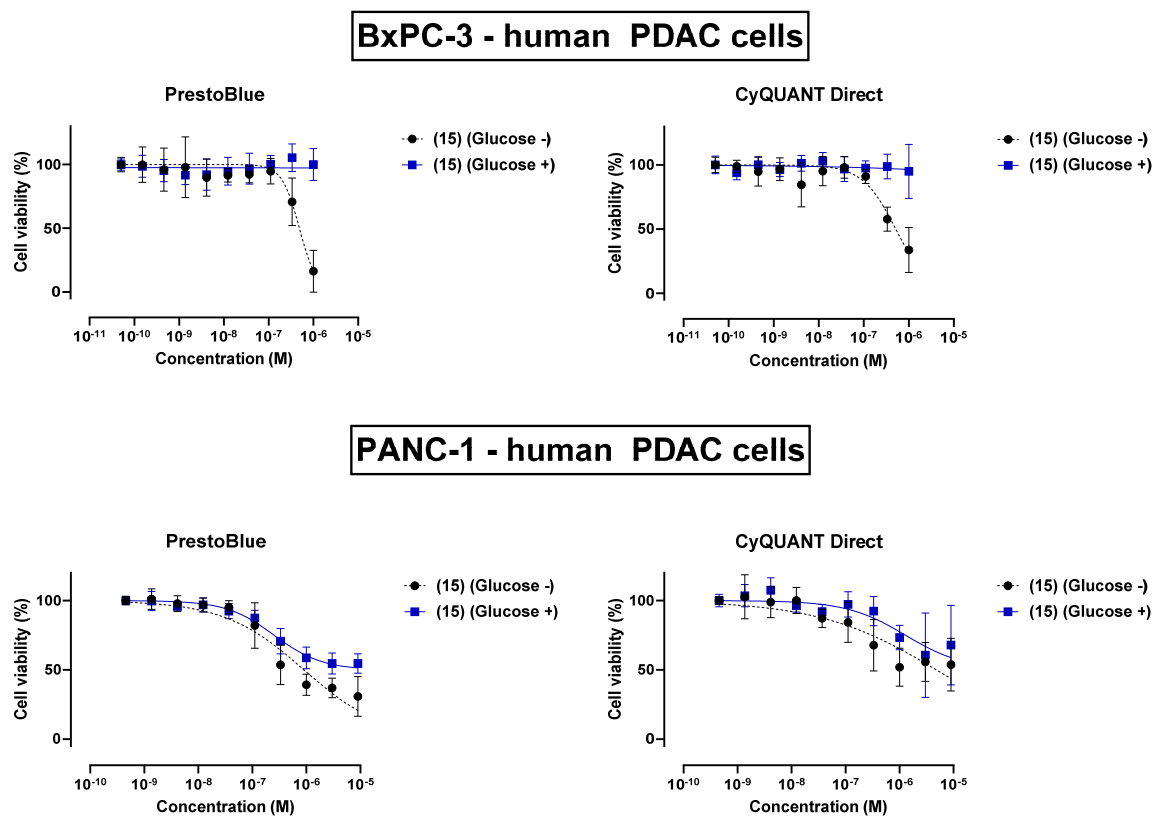

**Figure S12.** Comparative percent viability of BxPC-3 and PANC-1 human PDAC cells cultured under 'low glucose' (Glucose -) and 'normal glucose' (Glucose +) conditions following a 1-day exposure to trichoderin A analogue (15), as judged by the PrestoBlue™ and CyQUANT™ Direct assays.



### Synthesis of trichoderin A analogue (16)

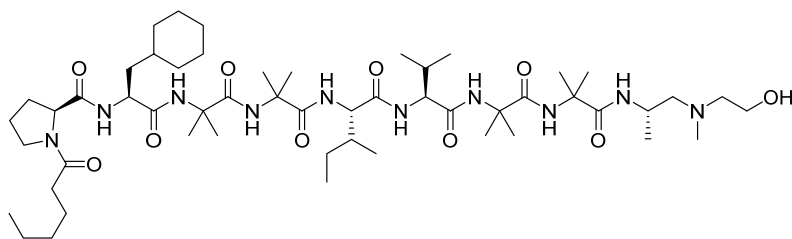

**Figure S13.** Chemical structure of trichoderin A analogue (16).

The C-terminal residue Fmoc-Aib-OH was attached to 2-chlorotrityl chloride resin **S1** according to **Method 1** to form peptidyl resin **S2** (**Scheme S5**). Loading was determined to be 0.43 mmol/g by **Method 2**. The N<sup>α</sup>-Fmoc-protecting group was removed using **Method 3** followed by coupling of Fmoc-Aib-OH via **Method 4** to give **S3**. The N<sup>α</sup>-Fmoc-protecting group was then removed using **Method 3** followed by coupling of Fmoc-Val-OH, Fmoc-Ile-OH, and Fmoc-Aib-OH via **Method 5** to afford peptidyl resin **S4**. After removal of N<sup>α</sup>-Fmoc-protecting group using **Method 3**, Fmoc-Aib-OH was coupled via **Method 4** to yield **S5**, followed by coupling of Fmoc-Cha-OH and Fmoc-Pro-OH by **Method 5**, and hexanoic acid via **Method 6** to complete the linear peptide sequence of **S14**. Resin-bound peptide was cleaved using **Method 7**, and the crude residue was purified by semi-preparative RP-HPLC using conditions outlined in the general method. Fractions were collected at 1 min intervals and analysed by ESI-MS and RP-HPLC. Fractions identified with the correct *m/z* were combined and lyophilised to afford peptide A15 as white fluffy flakes (13.4 mg, 14.6% yield). Late-stage solution phase C-terminal coupling was employed to introduce the C-terminal aminoalcohol moiety on the peptide (13.4 mg, 0.01 mmol) dissolved in 0.5 mL DMF using **Method 8**. The crude peptide solution was purified by semi-preparative RP-HPLC in 5 × 100 μL batches using conditions outlined in the general method. Fractions were collected at 1 min intervals and analysed by ESI-MS and RP-HPLC. Fractions identified with the correct *m/z* were combined and lyophilised to afford trichoderin A analogue (**16**) as a white amorphous solid (4.5 mg, 4.4% overall yield based on 0.1 mmol resin loading, 98.3% purity); *t<sub>R</sub>* 24.5 min; LRMS: *m/z* (ESI-MS) 1033.2 ([M+H]<sup>+</sup> requires 1033.4), **Figures S13-S14**. The peptide was subsequently evaluated for its *in vitro* cytotoxicity against BxPC-3 and PANC-1 human PDAC cells under both glucose-replete and glucose-deprived conditions on the same plate (**Figure S15**).

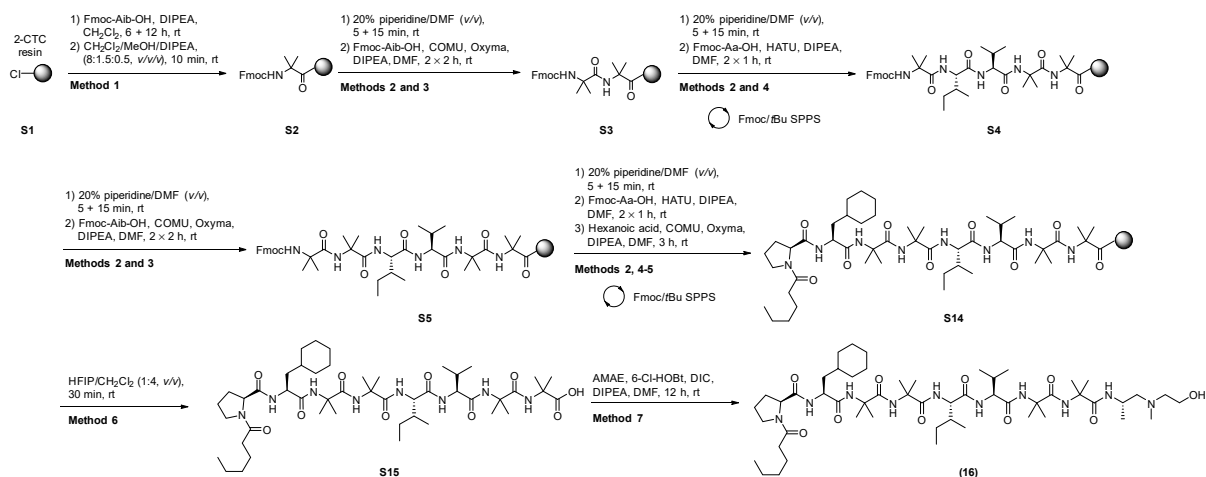

**Scheme S5.** Fmoc/*t*Bu SPPS of trichodermin A analogue (16).

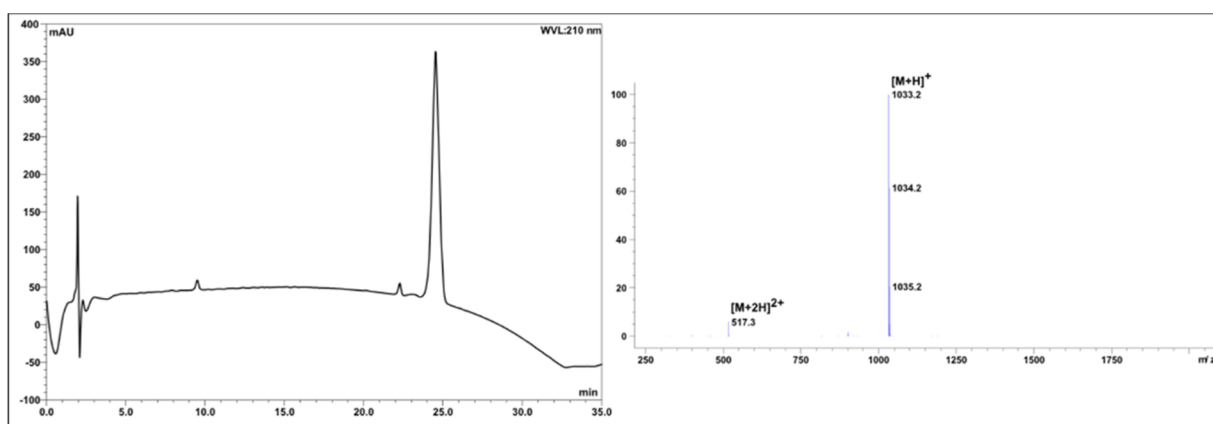

**Figure S14.** Analytical RP-HPLC profile of pure peptide (16) (*ca.* 98% as judged by peak area at 210 nm); xTerra® MS C18, 4.6 × 150 mm, 5 μm, linear gradient of 5% B to 95% B (*ca.* 3% B/min), 1 mL/min. *m/z* [M+H]<sup>+</sup> calculated: 1033.4; found: 1033.2.

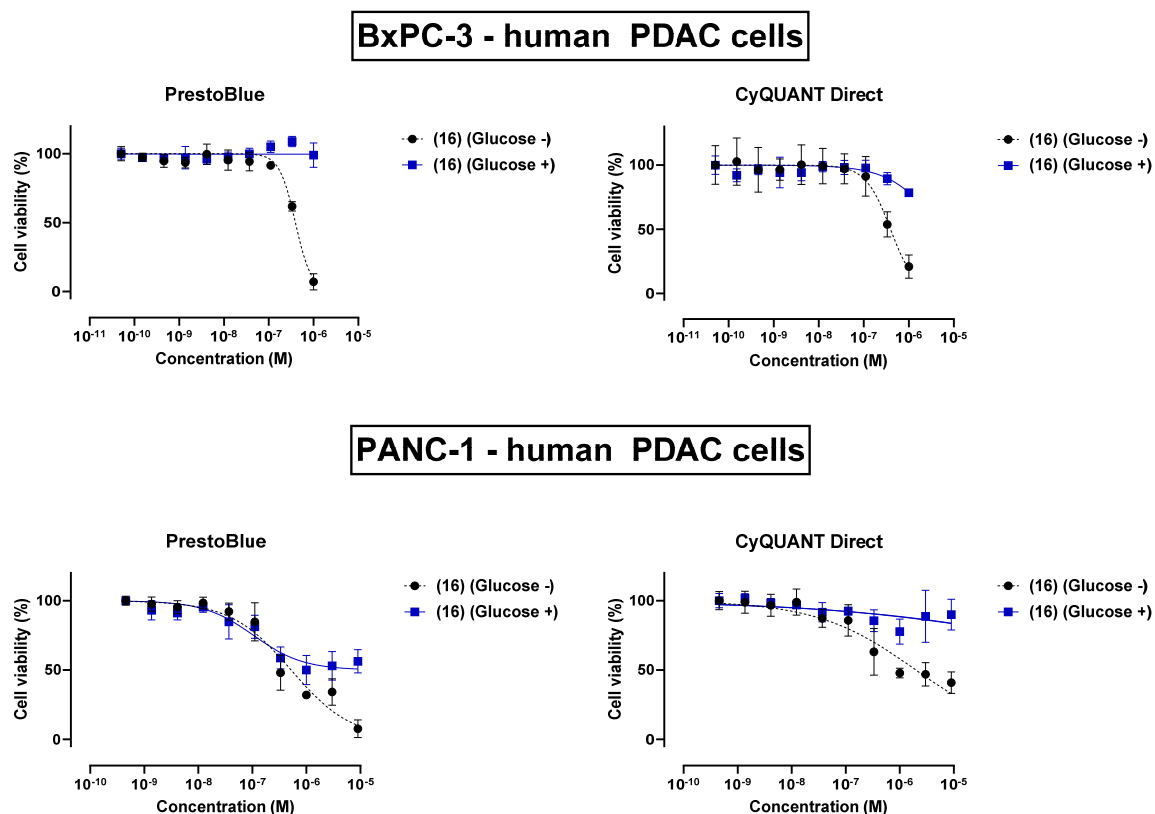

**Figure S15.** Comparative percent viability of BxPC-3 and PANC-1 human PDAC cells cultured under 'low glucose' (Glucose -) and 'normal glucose' (Glucose +) conditions following a 1-day exposure to trichoderin A analogue (16), as judged by the PrestoBlue™ and CyQUANT™ Direct assays.

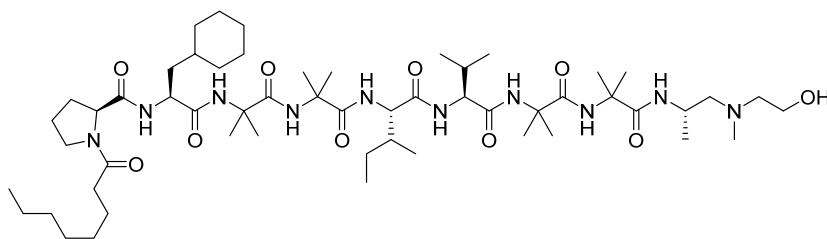

The C-terminal residue Fmoc-Aib-OH was attached to 2-chlorotriethyl chloride resin **S1** according to **Method 1** to form peptidyl resin **S2** (**Scheme S6**). Loading was determined to be 0.43 mmol/g by **Method 2**. The N<sup>α</sup>-Fmoc-protecting group was removed using **Method 3** followed by coupling of Fmoc-Aib-OH via **Method 4** to give **S3**. The N<sup>α</sup>-Fmoc-protecting group was then removed using **Method 3** followed by coupling of Fmoc-Val-OH, Fmoc-Ile-OH, and Fmoc-Aib-OH via **Method 5** to afford peptidyl resin **S4**. After removal of N<sup>α</sup>-Fmoc-protecting group using **Method 3**, Fmoc-Aib-OH was coupled via **Method 4** to yield **S5**, followed by coupling of Fmoc-Cha-OH and Fmoc-Pro-OH by **Method 5**, and octanoic acid via **Method 6** to complete the linear peptide sequence of **S16**. Resin-bound peptide was cleaved using **Method 7**, and the crude residue was purified by semi-preparative RP-HPLC using conditions outlined in the general method. Fractions were collected at 1 min intervals and analysed by ESI-MS and RP-HPLC. Fractions identified with the correct *m/z* were combined and lyophilised to afford peptide **S17** as white fluffy flakes (15.8 mg, 16.7% yield). Late-stage solution phase C-terminal coupling was employed to introduce the C-terminal aminoalcohol moiety on the peptide (15.8 mg, 0.02 mmol) dissolved in 0.5 mL DMF using **Method 8**. The crude peptide solution was purified by semi-preparative RP-HPLC in 5 × 100 µL batches using conditions outlined in the general method. Fractions were collected at 1 min intervals and analysed by ESI-MS and RP-HPLC. Fractions identified with the correct *m/z* were combined and lyophilised to afford trichoderin A analogue (**17**) as a white amorphous solid (6.1 mg, 5.7% overall yield based on 0.1 mmol resin loading, >99% purity); *t<sub>R</sub>* 26.2 min; LRMS: *m/z* (ESI-MS) 1061.3 ([M+H]<sup>+</sup> requires 1061.5), **Figures S16-S17**. The peptide was subsequently evaluated for its *in vitro* cytotoxicity against BxPC-3 and PANC-1 human PDAC cells under both glucose-replete and glucose-deprived conditions on the same plate (**Figure S18**).

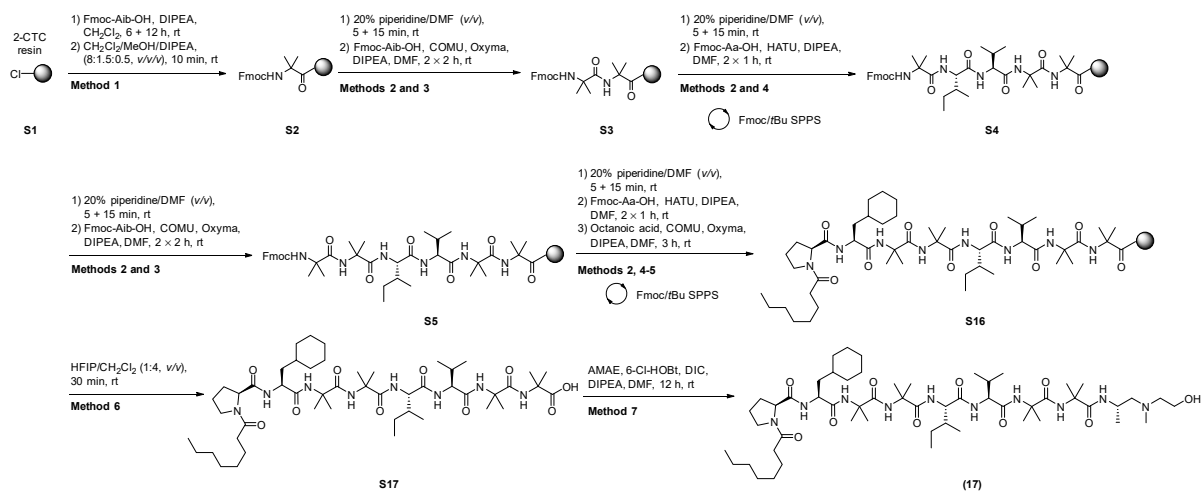

**Scheme S6.** Fmoc/tBu SPPS of trichoderin A analogue (**17**).

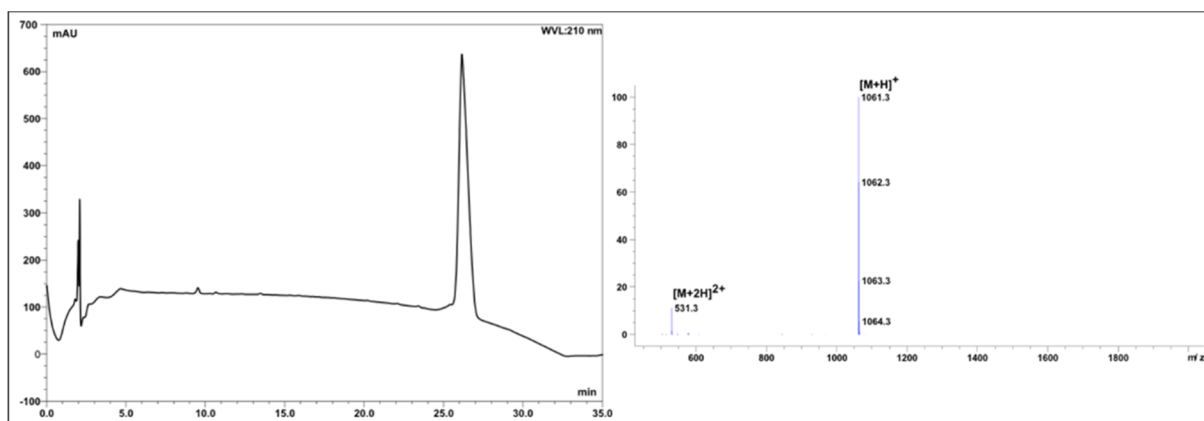

**Figure S17.** Analytical RP-HPLC profile of pure peptide (**17**) (*ca.* 99% as judged by peak area at 210 nm); xTerra® MS C18, 4.6 × 150 mm, 5  $\mu\text{m}$ , linear gradient of 5% B to 95% B (*ca.* 3% B/min), 1 mL/min. *m/z* [M+H]<sup>+</sup> calculated: 1061.5; found: 1061.3.

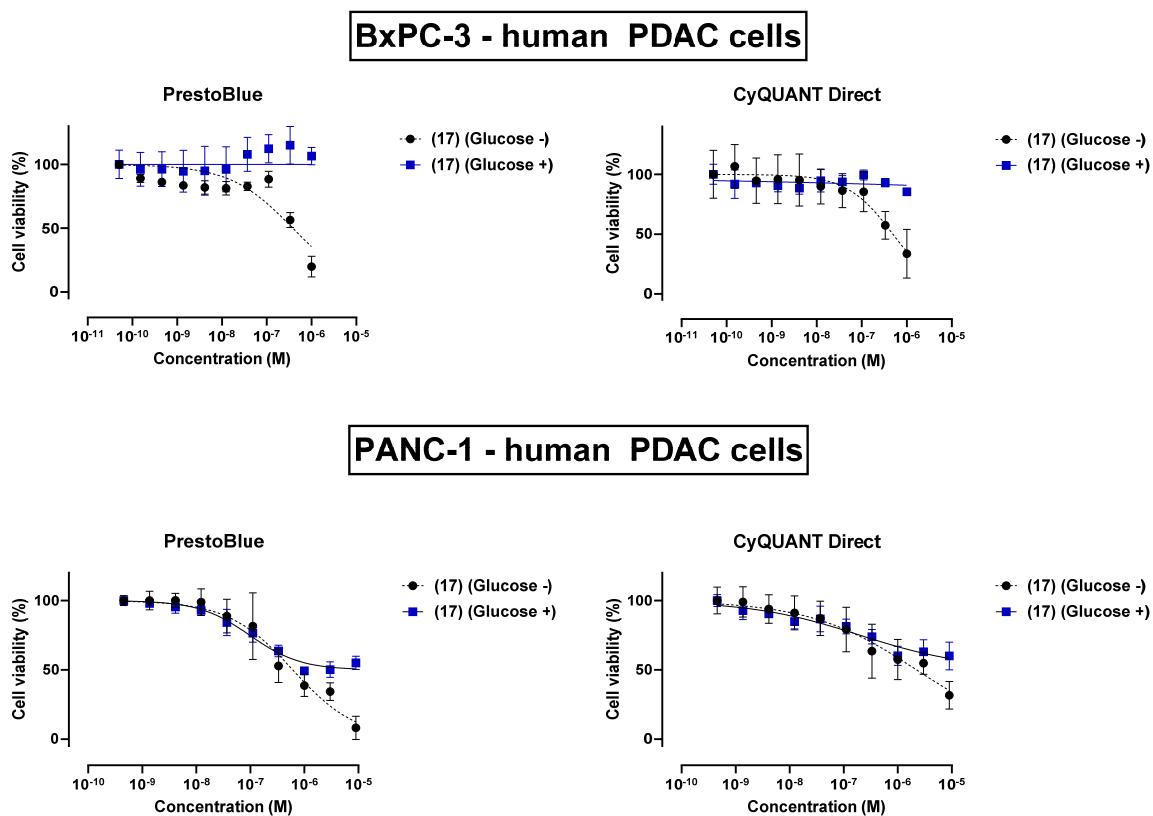

**Figure S18.** Comparative percent viability of BxPC-3 and PANC-1 human PDAC cells cultured under 'low glucose' (Glucose -) and 'normal glucose' (Glucose +) conditions following a 1-day exposure to trichoderin A analogue (17), as judged by the PrestoBlue™ and CyQUANT™ Direct assays.

## Synthesis of trichoderin A analogue (18)

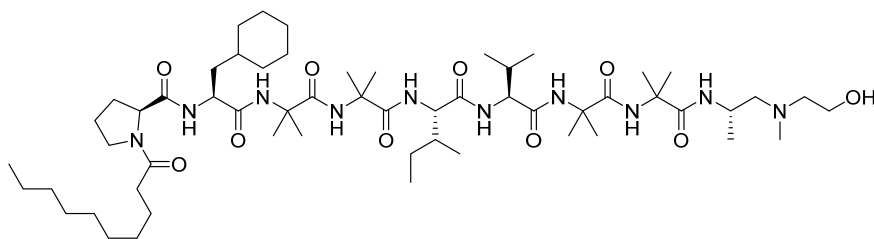

**Figure S19.** Chemical structure of trichoderin A analogue (18).

The C-terminal residue Fmoc-Aib-OH was attached to 2-chlorotrityl chloride resin **S1** according to **Method 1** to form peptidyl resin **S2** (**Scheme S7**). Loading was determined to be 0.43 mmol/g by **Method 2**. The N<sup>α</sup>-Fmoc-protecting group was removed using **Method 3** followed by coupling of Fmoc-Aib-OH via **Method 4** to give **S3**. The N<sup>α</sup>-Fmoc-protecting group was then removed using **Method 3** followed by coupling of Fmoc-Val-OH, Fmoc-Ile-OH, and Fmoc-Aib-OH via **Method 5** to afford peptidyl resin **S4**. After removal of N<sup>α</sup>-Fmoc-protecting group using **Method 3**, Fmoc-Aib-OH was coupled via **Method 4** to yield **S5**, followed by coupling of Fmoc-Cha-OH and Fmoc-Pro-OH by **Method 5**, and decanoic acid via **Method 6** to complete the linear peptide sequence of **S18**. Resin-bound peptide was cleaved using **Method 7**, and the crude residue was purified by semi-preparative RP-HPLC using conditions outlined in the general method. Fractions were collected at 1 min intervals and analysed by ESI-MS and RP-HPLC. Fractions identified with the correct *m/z* were combined and lyophilised to afford peptide **S19** as white fluffy flakes (25.9 mg, 26.6% yield). Late-stage solution phase C-terminal coupling was employed to introduce the C-terminal aminoalcohol moiety on the peptide (25.9 mg, 0.03 mmol) dissolved in 0.5 mL DMF using **Method 8**. The crude peptide solution was purified by semi-preparative RP-HPLC in 5 × 100 μL batches using conditions outlined in the general method. Fractions were collected at 1 min intervals and analysed by ESI-MS and RP-HPLC. Fractions identified with the correct *m/z* were combined and lyophilised to afford trichoderin A analogue (**18**) as a white amorphous solid (9.5 mg, 8.7% overall yield based on 0.1 mmol resin loading, 98.3% purity); *t<sub>R</sub>* 28.2 min; LRMS: *m/z* (ESI-MS) 1089.8 ([M+H]<sup>+</sup> requires 1089.5), **Figures S19-S20**. The peptide was subsequently evaluated for its *in vitro* cytotoxicity against BxPC-3 and PANC-1 human PDAC cells under both glucose-replete and glucose-deprived conditions on the same plate (**Figure S21**).

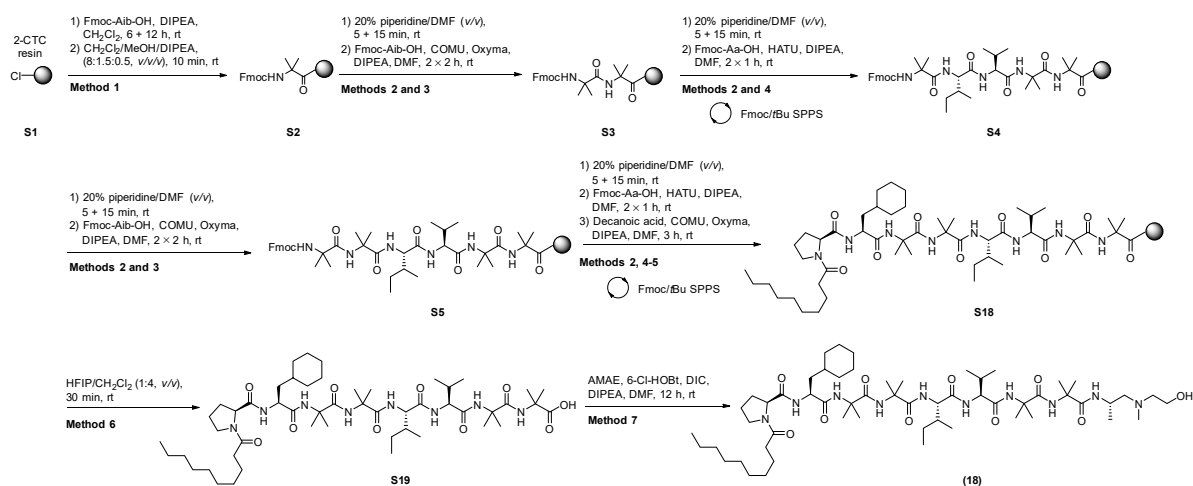

**Scheme S7. Fmoc/*t*Bu SPPS of trichodermin A analogue (18).**

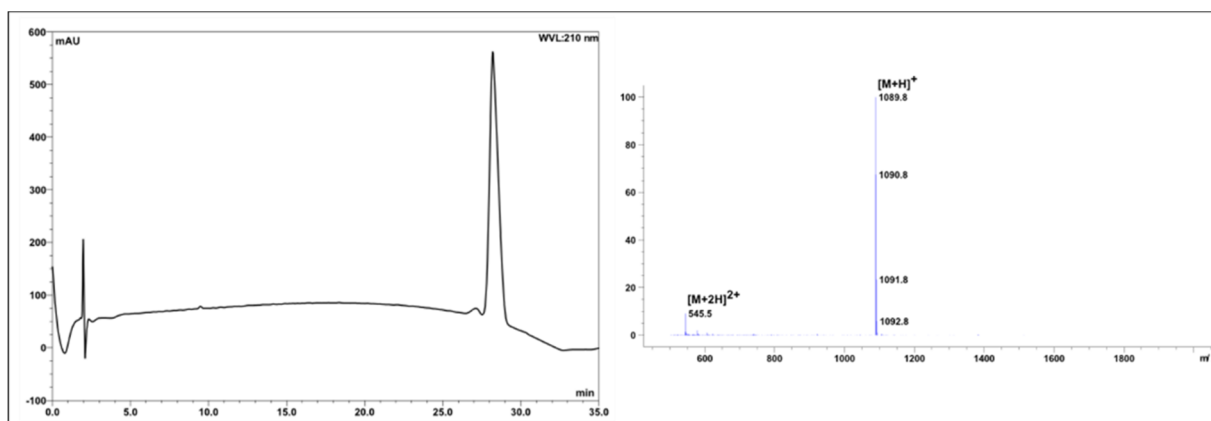

**Figure S20. Analytical RP-HPLC profile of pure peptide (18) (ca. 98% as judged by peak area at 210 nm); xTerra® MS C18, 4.6 × 150 mm, 5 μm, linear gradient of 5% B to 95% B (ca. 3% B/min), 1 mL/min. *m/z* [M+H]<sup>+</sup> calculated: 1089.5; found: 1089.8.**



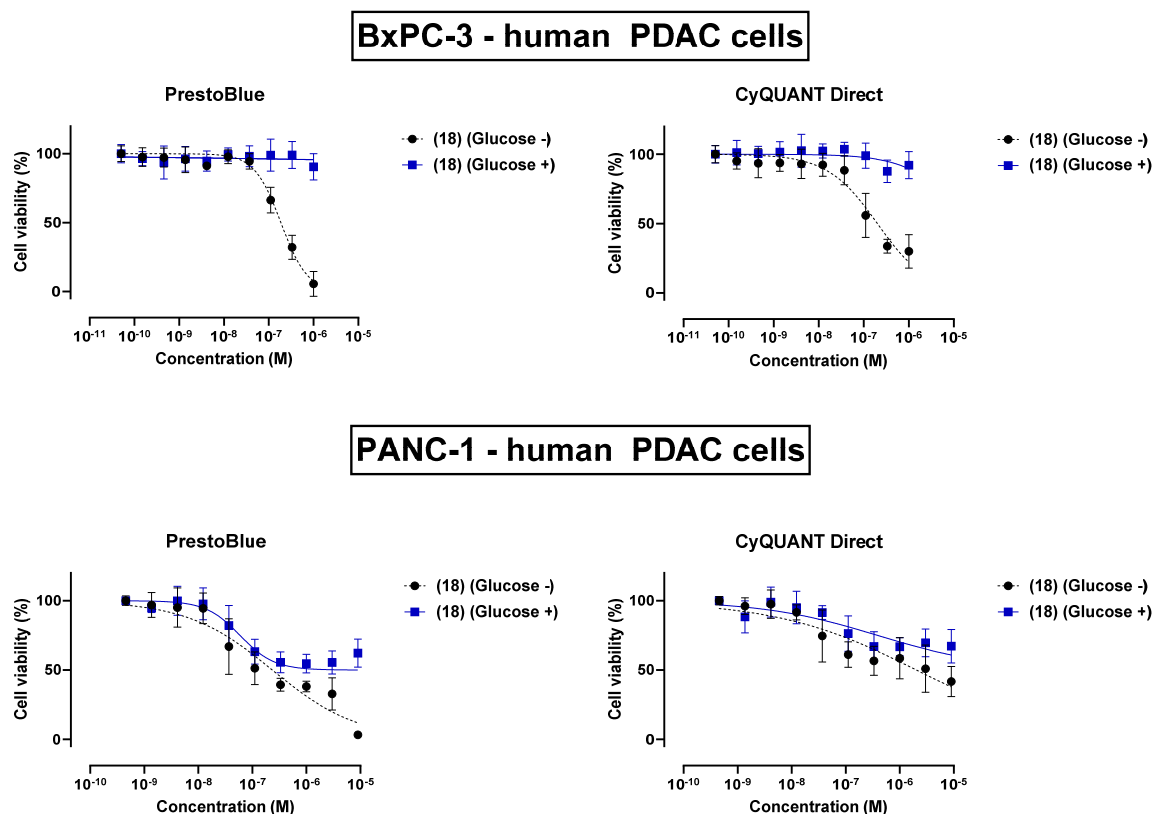

**Figure S21.** Comparative percent viability of BxPC-3 and PANC-1 human PDAC cells cultured under 'low glucose' (Glucose -) and 'normal glucose' (Glucose +) conditions following a 1-day exposure to trichoderin A analogue (18), as judged by the PrestoBlue™ and CyQUANT™ Direct assays.

## Synthesis of trichoderin A analogue (19)

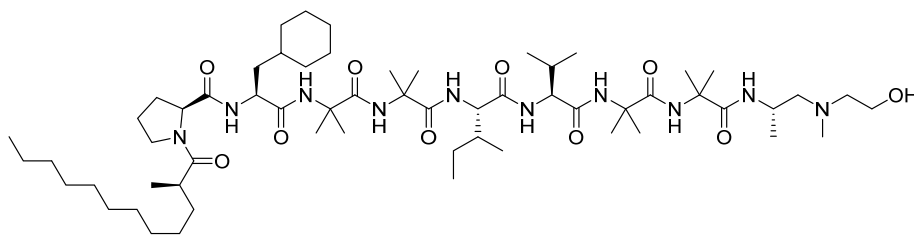

**Figure S22.** Chemical structure of trichoderin A analogue (19).

The C-terminal residue Fmoc-Aib-OH was attached to 2-chlorotrityl chloride resin **S1** according to **Method 1** to form peptidyl resin **S2** (**Scheme S8**). Loading was determined to be 0.43 mmol/g by **Method 2**. The N $^{\alpha}$ -Fmoc-protecting group was removed using **Method 3** followed by coupling of Fmoc-Aib-OH via **Method 4** to give **S3**. The N $^{\alpha}$ -Fmoc-protecting group was then removed using **Method 3** followed by coupling of Fmoc-Val-OH, Fmoc-Ile-OH, and Fmoc-Aib-OH via **Method 5** to afford peptidyl resin **S4**. After removal of N $^{\alpha}$ -Fmoc-protecting group using **Method 3**, Fmoc-Aib-OH was coupled via **Method 4** to yield **S5**, followed by coupling of Fmoc-Cha-OH and Fmoc-Pro-OH by **Method 5**, and dodecanoic acid via **Method 6** to complete the linear peptide sequence of **S20**. Resin-bound peptide was cleaved using **Method 7**, and the crude residue was purified by semi-preparative RP-HPLC using conditions outlined in the general method. Fractions were collected at 1 min intervals and analysed by ESI-MS and RP-HPLC. Fractions identified with the correct  $m/z$  were combined and lyophilised to afford peptide **S21** as white fluffy flakes (23.2 mg, 22.5% yield). Late-stage solution phase C-terminal coupling was employed to introduce the C-terminal aminoalcohol moiety on the peptide (23.2 mg, 0.02 mmol) dissolved in 0.5 mL DMF using **Method 8**. The crude peptide solution was purified by semi-preparative RP-HPLC in 5  $\times$  100  $\mu$ L batches using outlined in the general method. Fractions were collected at 1 min intervals and analysed by ESI-MS and RP-HPLC. Fractions identified with the correct  $m/z$  were combined and lyophilised to afford trichoderin A analogue (**19**) as a white amorphous solid (12.8 mg, 11.5% overall yield based on 0.1 mmol resin loading, >99% purity);  $t_R$  29.8 min; LRMS:  $m/z$  (ESI-MS) 1117.3 ([M+H] $^+$  requires 1117.6), **Figures S22-S23**. The peptide was subsequently evaluated for its *in vitro* cytotoxicity against BxPC-3 and PANC-1 human PDAC cells under both glucose-replete and glucose-deprived conditions on the same plate (**Figure S24**).

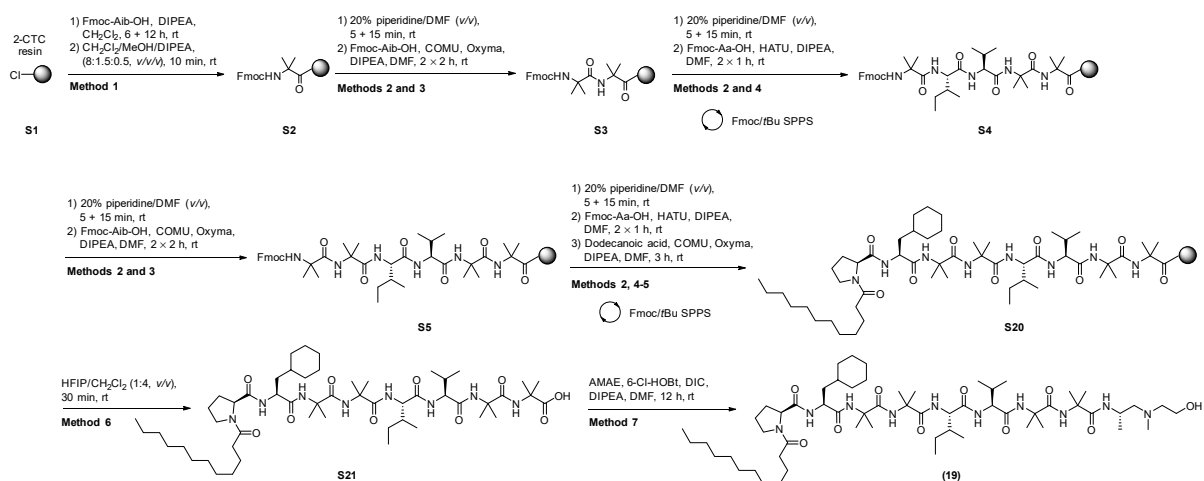

**Scheme S8.** Fmoc/tBu SPPS of trichodermin A analogue (19).

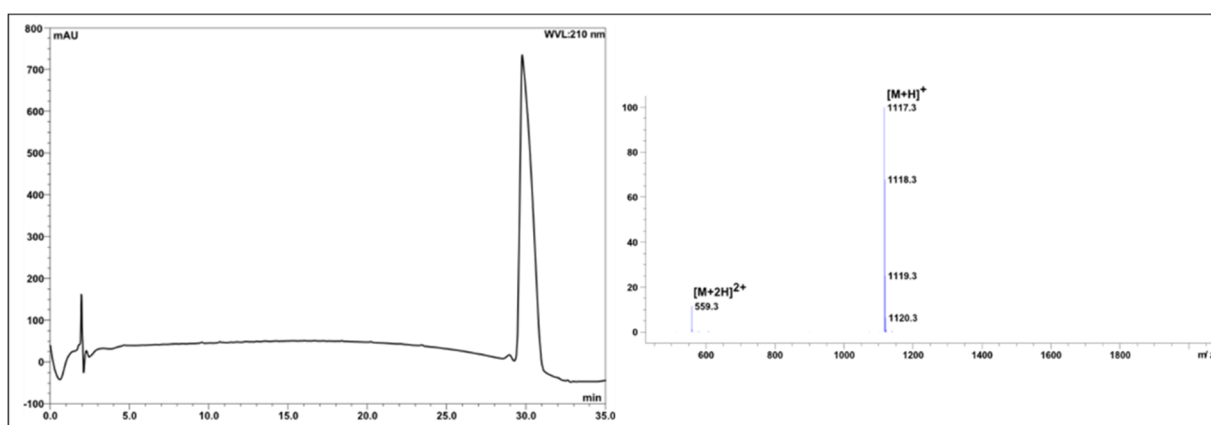

**Figure S23.** Analytical RP-HPLC profile of pure peptide (19) (*ca.* 99% as judged by peak area at 210 nm); xTerra® MS C18, 4.6 × 150 mm, 5 μm, linear gradient of 5% B to 95% B (*ca.* 3% B/min), 1 mL/min. *m/z* [M+H]<sup>+</sup> calculated: 1117.6; found: 1117.3.

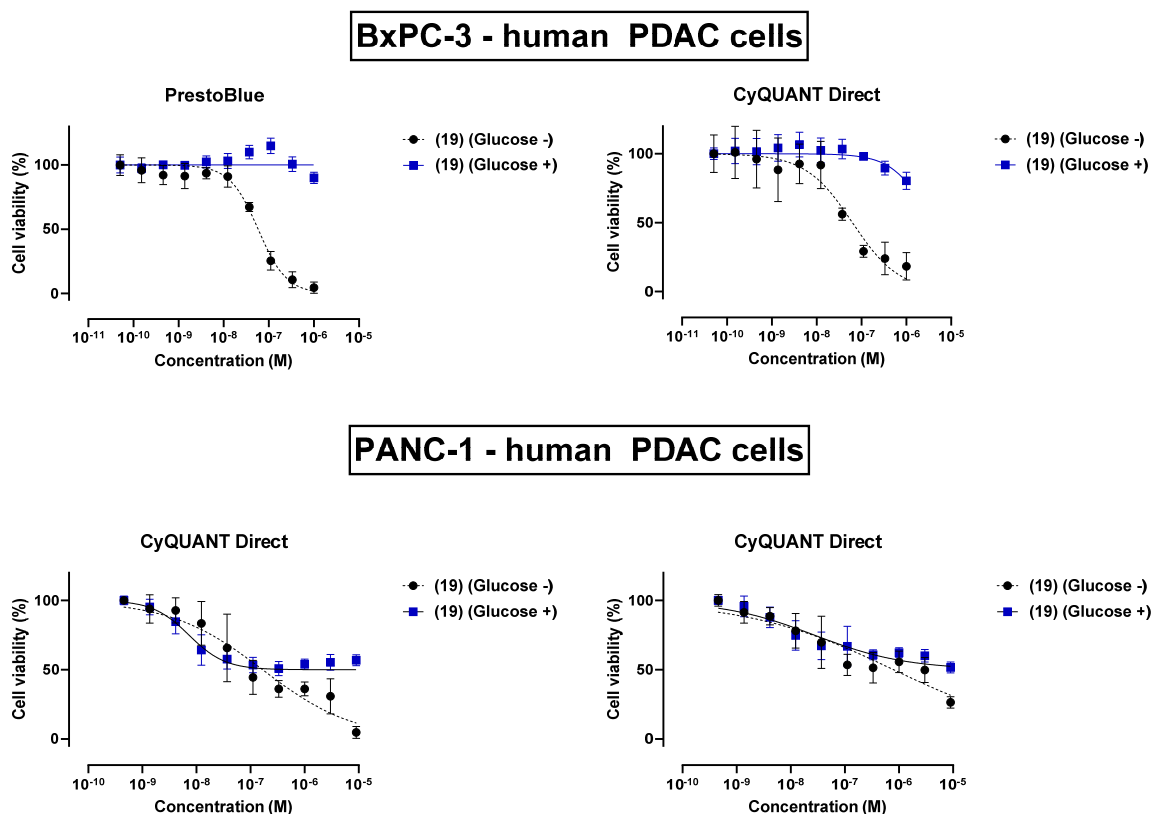

**Figure S24.** Comparative percent viability of BxPC-3 and PANC-1 human PDAC cells cultured under 'low glucose' (Glucose -) and 'normal glucose' (Glucose +) conditions following a 1-day exposure to trichoderin A analogue (19), as judged by the PrestoBlue™ and CyQUANT™ Direct assays.

## References

- (1) Kavianinia, I.; Kunalingam, L.; Harris, P. W. R.; Cook, G. M.; Brimble, M. A. Total Synthesis and Stereochemical Revision of the Anti-Tuberculosis Peptaibol Trichoderin A. *Org. Lett.* **2016**, *18* (15), 3878–3881.  
<https://doi.org/10.1021/acs.orglett.6b01886>.
